# Supplementary material
Source: HighWire-hosted journal article supplement (doi:10.1101/rna.079552.122)
Supplement: Supplemental_Figure_Legends.docx [file Supplemental_Figure_Legends.docx]

**Supplemental Figure Legends**

**Fig S1: Short-term brain incubation *ex vivo* is compatible with pseudo steady-state assumptions**

A: Comparison of total RNA levels from brains harvested directly after dissection to those harvested after incubation in assay media for 60 min.

B: Comparison of total RNA levels from brains harvested directly after dissection to those harvested after incubation in assay media with 500 µM 4sU for 60 min.

C: Comparison of the degradation / processing rate ratio (deg / proc rate) for the samples compared in A). Because both rates are measured in in hr-1, the ratio is unitless.

D: Same analysis as in C) but for the samples compared in B).

E: Reproducibility between the RNA-seq samples used in this study. The TPM values were compared for each replicate for all genes passing a cutoff of at least 10 counts in all libraries. For A – E, the Pearson r2 value is shown. In A – B, the axes limits were chosen to best display the majority of the data, which excluded four genes with low expression levels.

**Fig S2: Neuronally localized RNAs have high stability**

Boxplot of RNA stability for RNAs which have been identified as enriched in neural projections. Projection localized RNAs were defined as those with enrichment p<0.1 in at least three different studies (Kügelgen and Chekulaeva 2020). *p<0.05, **p<10e-10, ***p<10e-40.

**Fig S3: The relationship between decay rates, functional classes, and RNA abundance**

A: Relationship between the total RNA level and the decay rate. Spearman’s r2 is shown. The axis display limits were chosen to show the main data trend, which excluded two data points with very low values.

B: Stability percentile of GO slim molecular function categories. The GO slim categories were taken from the Flybase functional ribbon annotations. The histograms are displayed as kernel density estimates. The median expression level of the RNAs binned by stability percentile in each category is shown with the color map.

**Fig S4: The stability of cell-type-specific RNAs varies across central nervous system cell types**

The stabilities of RNAs that are enriched in specific cell types using the same metrics as in Fig. 3, but using the analysis from a companion study which assigned more specific cell type identities (Dillon et al. 2022). Cell type key: N = neurons, Gl = glia, NBs = neuroblasts, GMCs = ganglion mother cells, INPs = intermediate neural progenitors, KC = Kenyon cells. Other abbreviations: GABA (Gabaergic), Neurosec cells (neurosecretory cells), Immat (immature), Glut (glutamatergic), Octop (octopaminergic), Undiff (undifferentiated), Chol (cholinergic), Unann (unannotated), Pept (peptidergic), Mono (monoaminergic).

**Fig S5: Biological functions of stable and unstable cell-type-specific RNAs**

Enriched gene ontology (GO) terms in the biological process namespace is shown for the top 10% most stable cell-type-specific and bottom 10% most unstable cell-type-specific (CTS) RNAs.

**Fig. S6: mRNAs encoding RNA binding proteins are enriched in neural progenitor cells**

A: The same plot shown in Fig. 3A, but with the mRNAs known to encode RNA-binding proteins (RBPs) highlighted. mRBPs are RBPs which are known to bind mRNA and are a subset of RBPs.

B: Stability of cell-type-specific RNAs vs. ubiquitous RNAs for mRNAs encoding RBPs or mRBPs. The numbers in parentheses under the box plots indicate the number of genes in each category subdivided further into the ubiquitous and cell-type-specific groups. *p<0.05, **p<10e-10, ***p<10e-40.

**Fig S7: RNAs derived from Polycomb target genes increase in both nascent and total levels after Polycomb depletion**

A - B: The change in total RNA levels (A) or nascent RNA levels (B) after knockdown of Polycomb repressive complex 1 (PRC1 complex) subunit Ph in *Drosophila* neuronal cells (BG3 cells) (Pherson et al. 2017). The purple dots show genes that the authors defined defined as probable targets of Polycomb group silencing (PcG domain genes), determined by ChIP-seq against Ph and H3K27me3 in the same study.

C: The change in total RNA relative to the change in nascent RNA after Ph knockdown in BG3 cells.

D: The ratio of the change in total RNA to the change in nascent RNA for PcG domain genes vs. other genes in BG3 cells. *p<0.05.
